# Supplementary material
Source: Elsevier journal article supplement (https://www.sciencedirect.com/science/article/pii/S2341287919301577)
Supplement: mmc1 [file S2341287919301577:mmc1.pdf]

**Material suplementario****Respuesta a las preguntas del cuestionario****Distribución de la muestra**

|                                            |                                          |                                           |                                           |                         |  |
|--------------------------------------------|------------------------------------------|-------------------------------------------|-------------------------------------------|-------------------------|--|
| <i>Mujeres:</i> 336 (85.1)                 |                                          | <i>Hombres:</i> 59 (14.9)                 |                                           | <i>Edad:</i> 21,2 ± 2,8 |  |
| <i>Educación Infantil:</i> 226 (57.2)      |                                          | <i>Educación Primaria:</i> 169 (42.8)     |                                           |                         |  |
| <i>1<sup>er</sup> curso:</i> 148<br>(37,5) | <i>2<sup>o</sup> curso:</i> 72<br>(18,2) | <i>3<sup>er</sup> curso:</i> 69<br>(17,5) | <i>4<sup>o</sup> curso:</i> 106<br>(26,8) |                         |  |

**Preguntas relativas a conocimientos generales**

|                                                   |    |            |
|---------------------------------------------------|----|------------|
| <i>¿Posee conocimientos en primeros auxilios?</i> | Sí | 253 (64.1) |
|                                                   | No | 142 (35.9) |

| <b>De los que contestaron que sí (n = 253)</b>                                               |                                                                         | fi  | hi-253 | hi-395 |
|----------------------------------------------------------------------------------------------|-------------------------------------------------------------------------|-----|--------|--------|
| <i>Valore sus conocimientos</i>                                                              | Excelentes                                                              | 1   | 0,4    | 0,3    |
|                                                                                              | Buenos                                                                  | 36  | 14,2   | 9,1    |
|                                                                                              | Regulares                                                               | 181 | 71,5   | 45,8   |
|                                                                                              | Malos                                                                   | 29  | 11,5   | 7,3    |
|                                                                                              | Muy malos                                                               | 6   | 2,4    | 1,5    |
| <i>¿Cuándo ha realizado su última formación?</i>                                             | 0-3 meses                                                               | 23  | 9,1    | 5,8    |
|                                                                                              | 4-6 meses                                                               | 25  | 10,0   | 6,3    |
|                                                                                              | 7-12 meses                                                              | 71  | 28,1   | 18,0   |
|                                                                                              | 13-24 meses                                                             | 40  | 15,8   | 10,1   |
|                                                                                              | > 2 años                                                                | 87  | 34,4   | 22,0   |
|                                                                                              | Nunca                                                                   | 7   | 2,8    | 1,8    |
| <i>Ha recibido formación porque...<br/>(Se podía responder más de una)</i>                   | Era obligatorio en el colegio / instituto / universidad...              | 172 | 68,0   | 43,5   |
|                                                                                              | Me lo exigieron en el trabajo                                           | 13  | 5,1    | 3,2    |
|                                                                                              | Me parece una formación fundamental                                     | 65  | 25,7   | 16,5   |
|                                                                                              | Comprendí su importancia tras un grave accidente de un allegado         | 10  | 4,0    | 2,5    |
|                                                                                              | Comprendí su importancia tras un grave accidente que sufrí en el pasado | 2   | 0,8    | 0,5    |
|                                                                                              | Otros                                                                   | 39  | 15,4   | 9,9    |
| <b>De los que contestaron que no (n = 142)</b>                                               |                                                                         | fi  | hi-142 | hi-395 |
| <i>¿Por qué no tiene formación en primeros auxilios?<br/>(Se podía responder más de una)</i> | Poco interés                                                            | 8   | 5,6    | 2,0    |
|                                                                                              | Poco tiempo                                                             | 33  | 23,2   | 8,4    |
|                                                                                              | No sé dónde puedo hacer un curso                                        | 47  | 33,1   | 12,0   |
|                                                                                              | Por el precio                                                           | 18  | 12,7   | 4,6    |
|                                                                                              | No me lo había planteado                                                | 66  | 46,5   | 16,7   |
|                                                                                              | Otros                                                                   | 14  | 9,9    | 3,5    |

**Preguntas relativas a la secuencia de actuación**

|                                                                |    |            |
|----------------------------------------------------------------|----|------------|
| <i>¿Sabría actuar ante una persona aparentemente sin vida?</i> | Sí | 215 (54,4) |
|                                                                | No | 180 (45,6) |

| De los que contestaron que sí (n = 215)                                                                            |                                                               | fi         | hi-215 | hi-395 |
|--------------------------------------------------------------------------------------------------------------------|---------------------------------------------------------------|------------|--------|--------|
| <i>Ordene la secuencia numerando los pasos</i>                                                                     | Los que lo hicieron bien                                      | 10         | 4,7    | 2,5    |
|                                                                                                                    | Los que lo hicieron mal                                       | 55         | 25,6   | 13,9   |
|                                                                                                                    | Los que aun diciendo que sabían, respondieron ("No sé")       | 150        | 70,0   | 38,0   |
| <b>Preguntas relativas a la RCP</b>                                                                                |                                                               |            |        |        |
| <i>¿Sabe realizar una RCP?</i>                                                                                     | Sí                                                            | 185 (46,8) |        |        |
|                                                                                                                    | No, pero he oído hablar de ello                               | 201 (50,9) |        |        |
|                                                                                                                    | No, y nunca he oído hablar de ello                            | 9 (2,3)    |        |        |
| De los que respondieron que sí (n = 185)                                                                           |                                                               | fi         | hi-185 | hi-395 |
| <i>El ratio compresión:ventilación en la RCP realizada a <u>un niño de seis años es...</u></i>                     | No se hacen ventilaciones                                     | 0          | 0,0    | 0,0    |
|                                                                                                                    | 5 ventilaciones iniciales y 30 compresiones y 2 ventilaciones | 68         | 36,8   | 17,2   |
|                                                                                                                    | 5 ventilaciones iniciales y 15 compresiones y 2 ventilaciones | 63         | 34,1   | 15,9   |
|                                                                                                                    | 15 compresiones y 1 ventilación                               | 31         | 16,8   | 7,8    |
|                                                                                                                    | Los que aun diciendo que sabían, respondieron ("No sé")       | 23         | 12,4   | 5,8    |
| <i>La profundidad y el ritmo al que tengo que realizar las compresiones a <u>un niño de seis años...</u></i>       | 5 centímetros y 100-120 compresiones/min                      | 20         | 10,8   | 5,1    |
|                                                                                                                    | 4 centímetros y 90-110 compresiones/min                       | 33         | 17,8   | 8,3    |
|                                                                                                                    | 3 centímetros y 100-120 compresiones/min                      | 28         | 15,1   | 7,1    |
|                                                                                                                    | Ninguna                                                       | 2          | 1,1    | 0,5    |
|                                                                                                                    | Los que aun diciendo que sabían, respondieron ("No sé")       | 102        | 55,1   | 25,8   |
| <i>El ratio compresión:ventilación en la RCP realizada a <u>un niño de un año es...</u></i>                        | No se hacen ventilaciones                                     | 20         | 10,8   | 5,1    |
|                                                                                                                    | 5 ventilaciones iniciales y 30 compresiones y 2 ventilaciones | 14         | 7,6    | 3,5    |
|                                                                                                                    | 5 ventilaciones iniciales y 15 compresiones y 2 ventilaciones | 38         | 20,5   | 9,6    |
|                                                                                                                    | 15 compresiones y 1 ventilación                               | 42         | 22,7   | 10,6   |
|                                                                                                                    | Los que aun diciendo que sabían, respondieron ("No sé")       | 71         | 38,3   | 18,0   |
| <i>La profundidad y el ritmo al que tengo que realizar las compresiones a <u>un niño de menos de un año...</u></i> | 5 centímetros y 100-120 compresiones/min                      | 1          | 0,5    | 0,3    |
|                                                                                                                    | 4 centímetros y 90-110 compresiones/min                       | 4          | 2,1    | 1,0    |
|                                                                                                                    | 3 centímetros y 100-120 compresiones/min                      | 75         | 40,5   | 19,0   |
|                                                                                                                    | Ninguna                                                       | 2          | 1,1    | 0,5    |
|                                                                                                                    | Los que aun diciendo que sabían, respondieron ("No sé")       | 103        | 55,7   | 26,1   |

### Preguntas relativas al DESA y OVACE

|                                                                           |                                                         |            |        |        |
|---------------------------------------------------------------------------|---------------------------------------------------------|------------|--------|--------|
| <i>Un desfibrilador automático / semiautomático...</i>                    | Sé para qué sirve, pero no sé usarlo                    | 207 (52,4) |        |        |
|                                                                           | Sé para qué sirve y sé usarlo                           | 105 (26,6) |        |        |
|                                                                           | No sé usarlo, pero he oído hablar de ello               | 55 (13,9)  |        |        |
|                                                                           | Nunca he oído hablar de ello                            | 28 (7,1)   |        |        |
| <i>¿Sabría actuar ante un atragantamiento (obstrucción de vía aérea)?</i> | Sí                                                      | 235 (59,5) |        |        |
|                                                                           | No, pero he oído hablar de ello                         | 158 (40,0) |        |        |
|                                                                           | No, y nunca he oído hablar de ello                      | 2 (0,5)    |        |        |
| <b>De los que contestaron que sí (n = 235)</b>                            |                                                         | fi         | hi-235 | hi-395 |
| <i>Ordene la secuencia numerando los pasos</i>                            | Los que lo hicieron bien                                | 176        | 74,9   | 44,6   |
|                                                                           | Los que lo hicieron mal                                 | 18         | 7,7    | 4,6    |
|                                                                           | Los que aun diciendo que sabían, respondieron ("No sé") | 41         | 17,4   | 10,4   |

### Preguntas de opinión

|                                                                                            |                                                                                                                |            |  |  |
|--------------------------------------------------------------------------------------------|----------------------------------------------------------------------------------------------------------------|------------|--|--|
| <i>Considero que la formación en primeros auxilios... (Se podía responder más de una)</i>  | Es exclusivamente cosa de servicios sanitarios o personal cualificado como socorristas, bomberos o policías... | 0 (0,0)    |  |  |
|                                                                                            | Debería conocer las nociones básicas toda persona que tenga/trabaje con niños/as                               | 175 (44,3) |  |  |
|                                                                                            | Es útil, nunca sabes en qué momento puedes precisar de esta formación                                          | 185 (46,8) |  |  |
|                                                                                            | Todo el mundo debería tener nociones básicas de primeros auxilios                                              | 345 (87,3) |  |  |
|                                                                                            | Otros                                                                                                          | 10 (2,5)   |  |  |
| <i>Los primeros auxilios deberían ser un contenido obligatorio en el sistema educativo</i> | Totalmente de acuerdo                                                                                          | 336 (85,1) |  |  |
|                                                                                            | De acuerdo                                                                                                     | 59 (14,9)  |  |  |
|                                                                                            | En desacuerdo                                                                                                  | 0 (0,0)    |  |  |
|                                                                                            | Totalmente en desacuerdo                                                                                       | 0 (0,0)    |  |  |

La variable edad se expresa en años: media  $\pm$  desviación típica

Datos expresados mediante frecuencias absolutas (frecuencias relativas)

fi: Frecuencia absoluta

hi: Frecuencia relativa
